# Supplementary material for: Physical mechanism on the linear spectrum and nonlinear spectrum in a twist bilayer graphdiyne nanodisk
Source: Royal Society of Chemistry journal article supplement (doi:10.1039/d3cp01858j), 2023-01-01
Supplement: d3cp01858j1.pdf [file d3cp01858j1.pdf]

## Supporting information

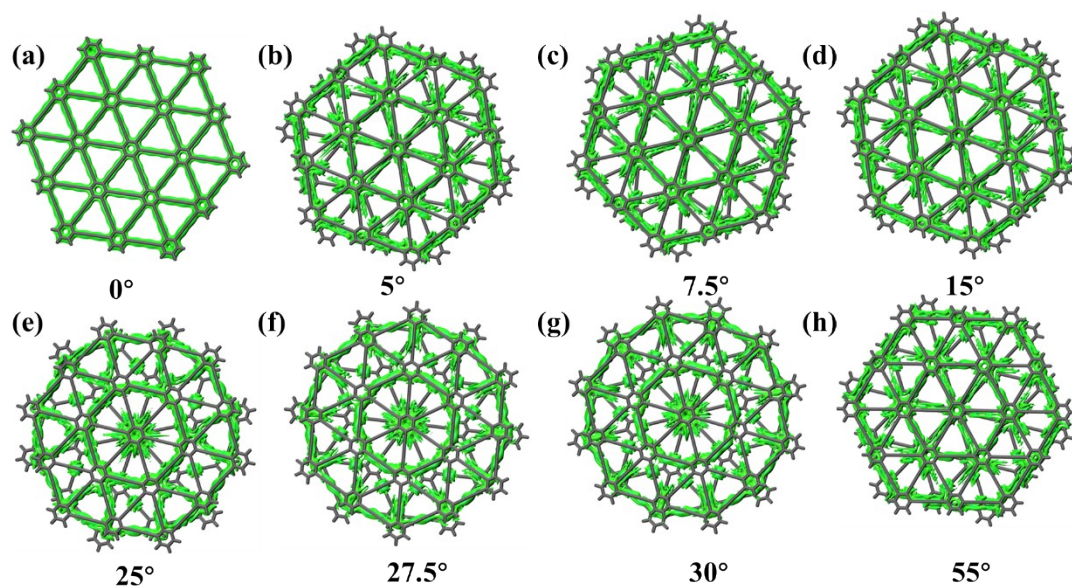

Figure S1: weak interlayer interaction in TwBLGDY when twist angle increases from 0° to 55°.

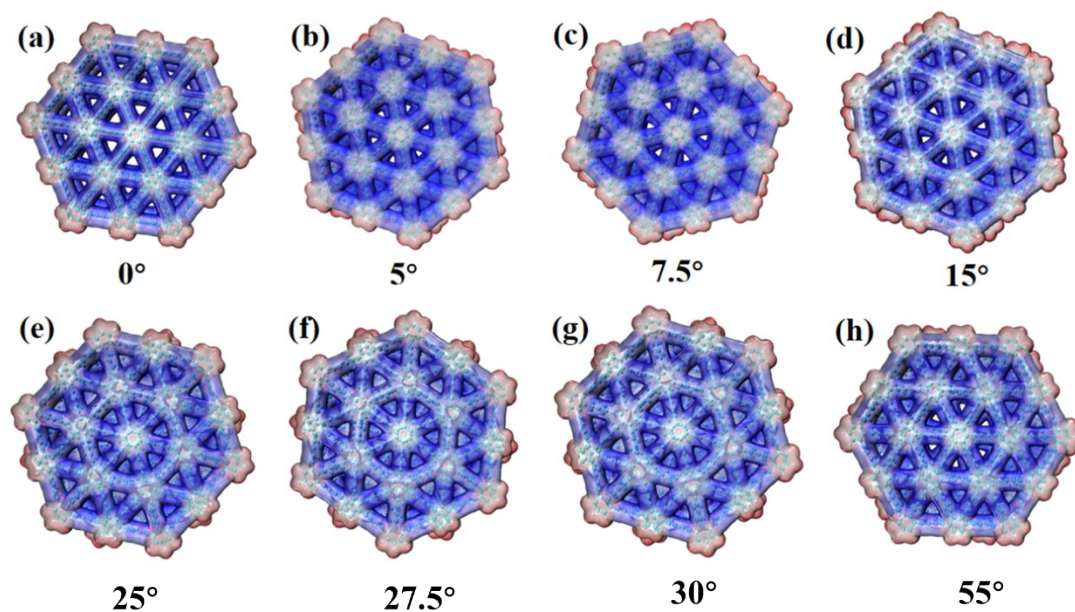

Figure S2: Molecular surface electrostatic potential of TwBLGDY as twist angle increases from 0° to 55°.

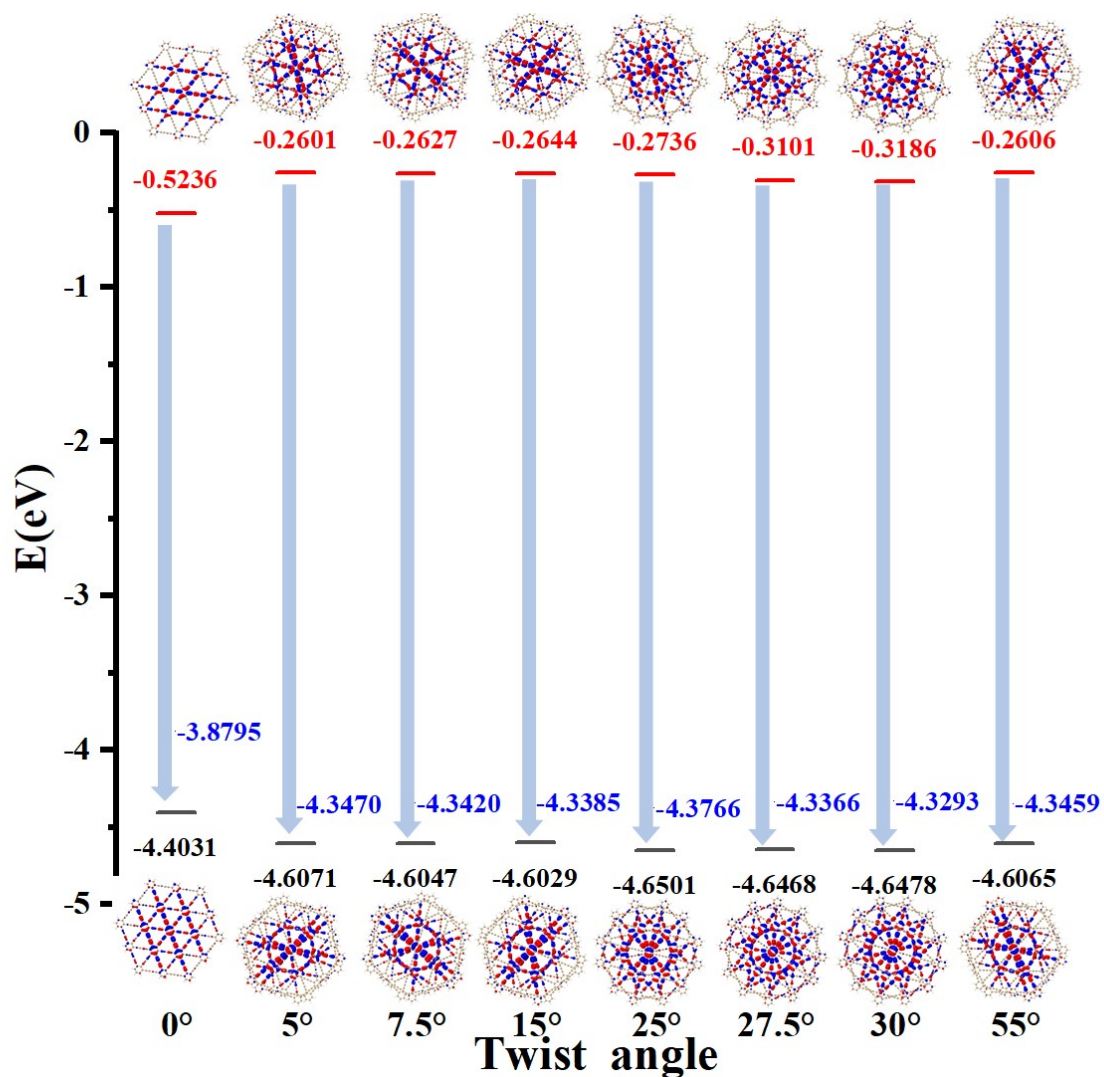

Figure S3: HOMO-LUMO molecular orbitals of TwBLGDY at different twist angles.

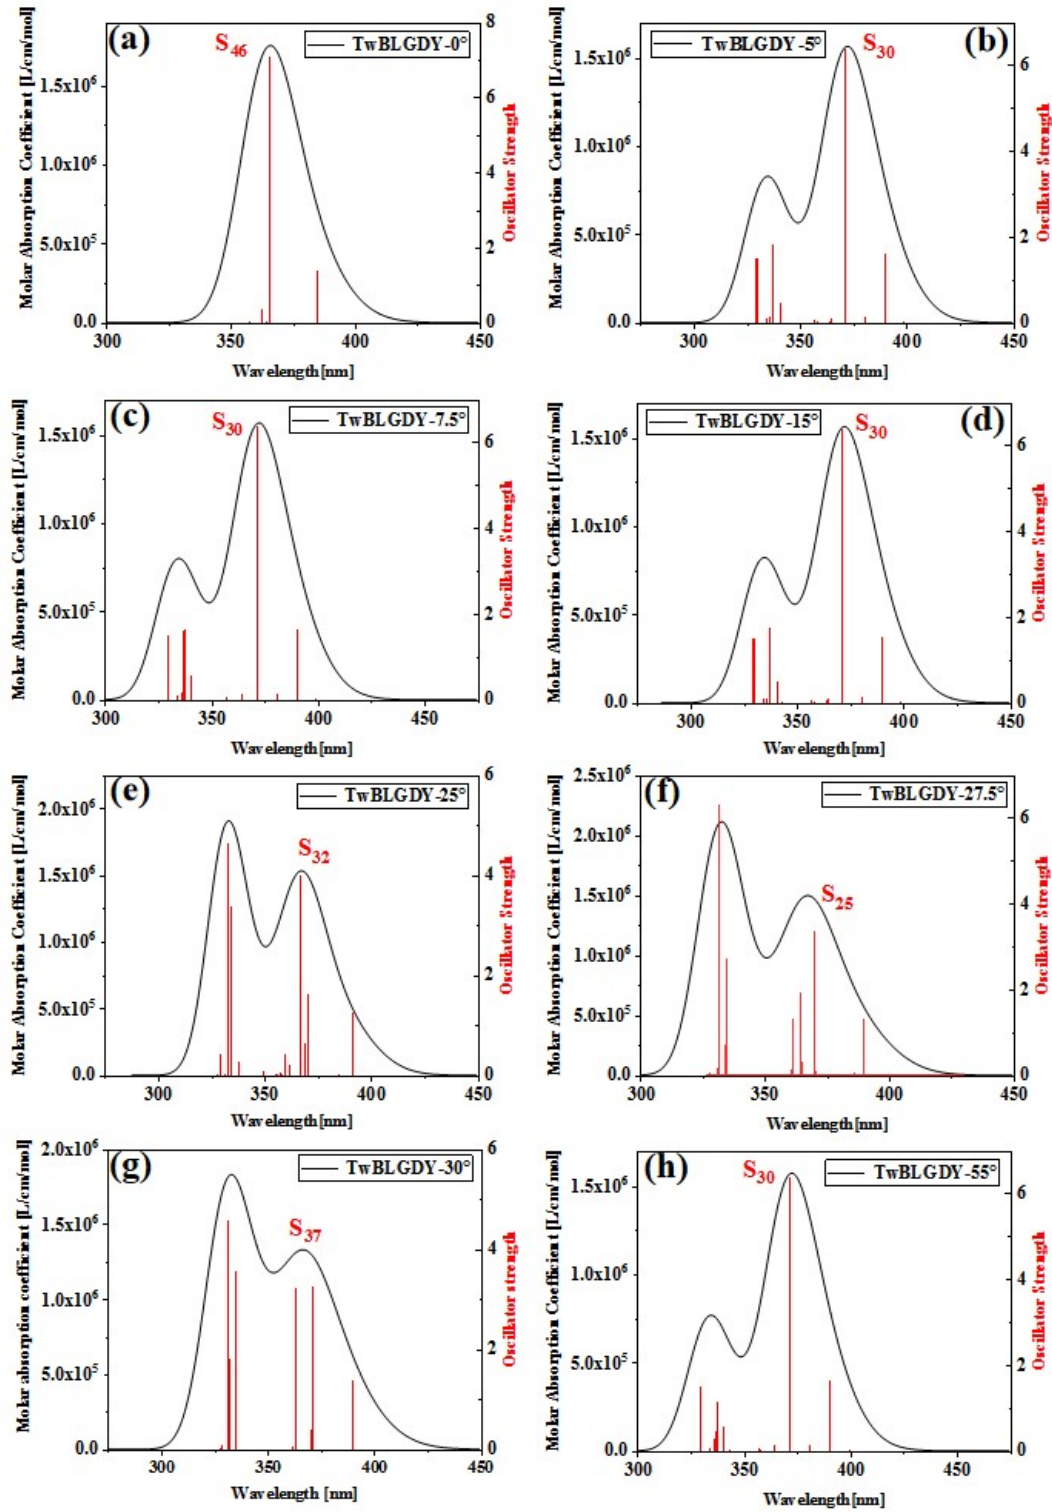

Figure S4: The OPA spectrum of TwBLGDY when the twist angle increases from 0° to 55°. The right vertical axis is the oscillator strength.

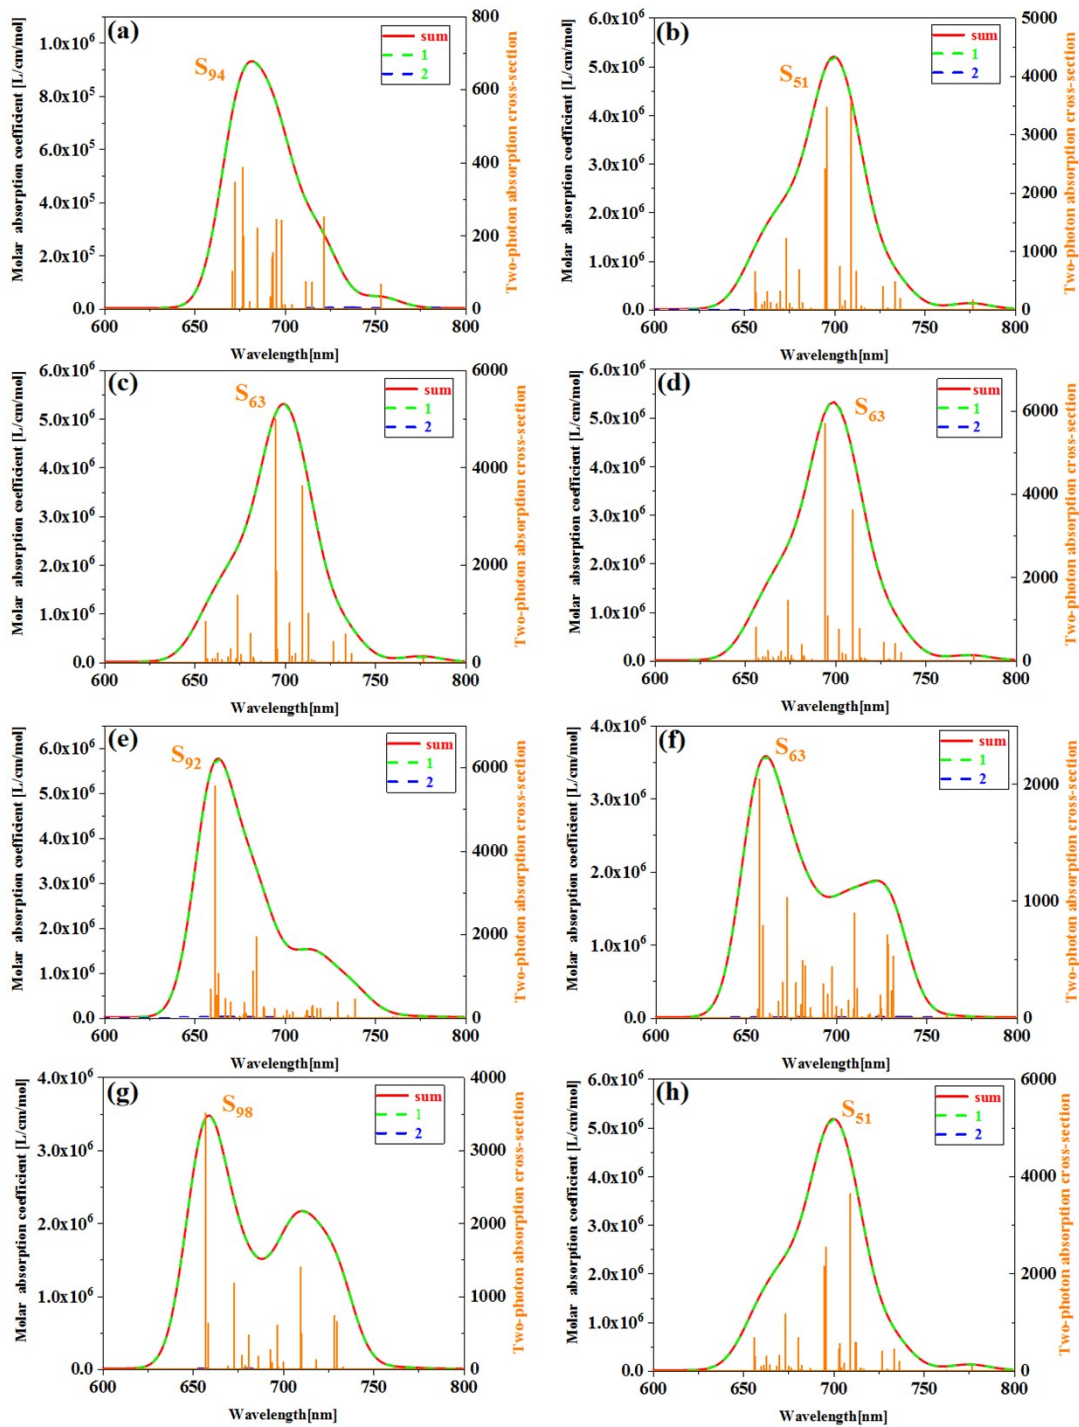

Figure S5: TPA spectrum of TwBLGDY as the twist angle increases from 0° to 55°. The right ordinate is the TPA cross-section.

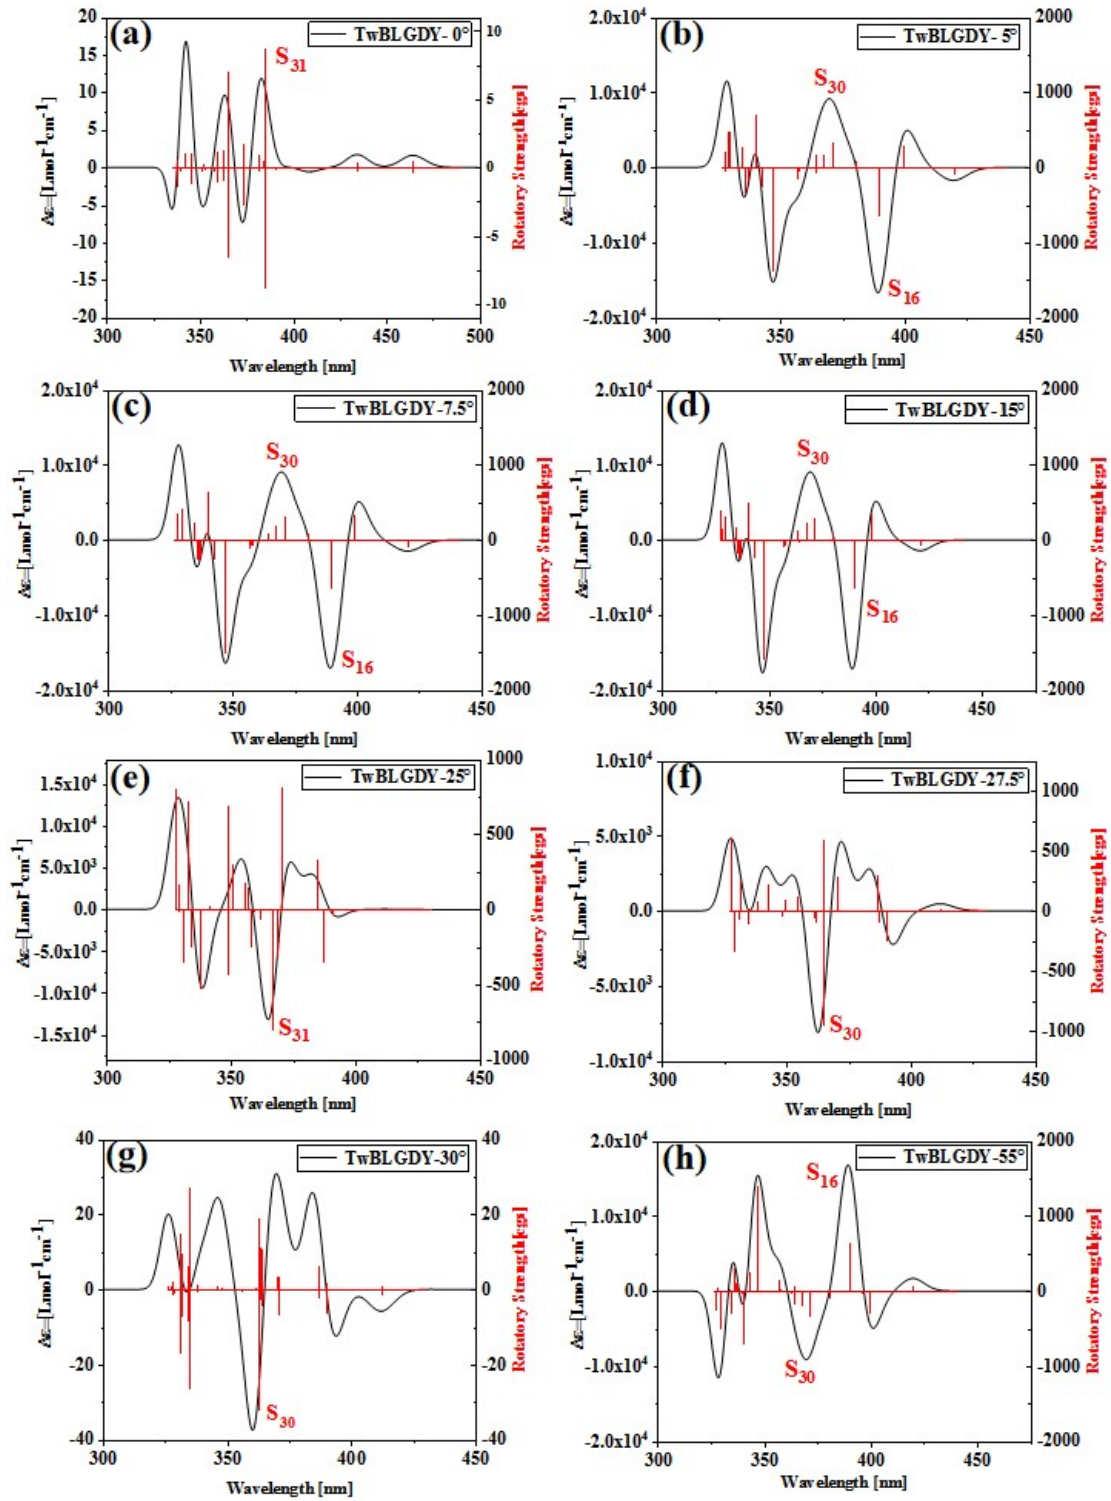

Figure. S6: ECD spectrum of TwBLGDY when twist angle increases from  $0^\circ$  to  $55^\circ$ , and the right ordinate is rotatory strength.
